# Supplementary material
Source: Springer Nature journal article supplement (https://www.springermedizin.de/resource/supplementary/12937_2006_98_MOESM1_ESM.pdf/25654392)
Supplement: MOESM1 [file 25654392]

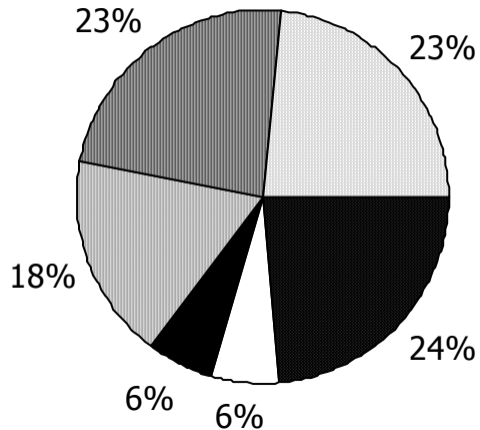

- Hereditary degenerative disorder
- West syndrome
- ▨ Lennox-Gastaut syndrome
- ▩ Brain injures malformation
- ▧ Cerebral palsy
- ▦ Severe myoclonic epilepsy
